# Supplementary material
Source: PubMed Central journal article supplement (PMC6150691)
Supplement: jm8b00860_si_001.pdf [file jm8b00860_si_001.pdf]

## Supporting Information

# An Affinity-Based Probe for the Human Adenosine A<sub>2A</sub> Receptor

*Xue Yang<sup>†</sup>, Thomas J. M. Michiels<sup>†</sup>, Coen de Jong<sup>†</sup>, Marjolein Soethoudt<sup>§</sup>, Niek Dekker<sup>‡</sup>, Euan Gordon<sup>‡</sup>, Mario van der Stelt<sup>§</sup>, Laura H. Heitman<sup>†</sup>, Daan van der Es<sup>†</sup> and Adriaan P. IJzerman<sup>\*,†</sup>*

<sup>†</sup>Division of Drug Discovery and Safety, Leiden Academic Centre for Drug Research and

<sup>§</sup>Department of Molecular Physiology, Leiden Institute of Chemistry, Leiden University, Einsteinweg 55, 2333 CC Leiden, The Netherlands

<sup>‡</sup>Discovery Sciences, IMED Biotech Unit, AstraZeneca, Gothenburg, Sweden

\*E-mail: [ijzerman@lacdr.leidenuniv.nl](mailto:ijzerman@lacdr.leidenuniv.nl)

### Contents:

- Table S1. Apparent Affinities of **4** at the Human A<sub>1</sub> and A<sub>3</sub> Adenosine Receptor Subtypes.
- Table S2. Affinities of ZM241385 on hA<sub>2A</sub>R Preincubated with Different Concentrations of the Indicated Compounds

## Supplementary data

Table S1. Apparent Sffinities of **4** at the Human A<sub>1</sub> and A<sub>3</sub> Adenosine Receptor Subtypes<sup>a</sup>.

| compound | p <i>K</i> <sub>i</sub>      |                               |                              |
|----------|------------------------------|-------------------------------|------------------------------|
|          | hA <sub>1</sub> <sup>b</sup> | hA <sub>2A</sub> <sup>c</sup> | hA <sub>3</sub> <sup>d</sup> |
| <b>4</b> | 7.72 ± 0.05                  | 8.82 ± 0.02                   | 7.22 ± 0.01                  |

<sup>a</sup>Data are expressed as p*K*<sub>i</sub> values (means ± SEM) of three separate experiments each performed in duplicate.

<sup>b</sup>Affinity determined from displacement of specific [<sup>3</sup>H]DPCPX binding on CHO cell membranes stably expressing human adenosine A<sub>1</sub> receptors at 25°C during 3 h incubation.

<sup>c</sup>Affinity determined from displacement of specific [<sup>3</sup>H]ZM241385 binding from the hA<sub>2A</sub>R at 25 °C during 3 h incubation.

<sup>d</sup>Affinity determined from displacement of specific [<sup>3</sup>H]PSB-11 binding on CHO cell membranes stably expressing human adenosine A<sub>3</sub> receptors at 25°C during 3 h incubation.

## Supplementary data

Table S2. Affinities of ZM241385 on hA<sub>2A</sub>R Preincubated with Different Concentrations of the Indicated Compounds<sup>a</sup>

| Preincubated Compound        | p <i>K</i> <sub>i</sub><br>IC <sub>50</sub> | p <i>K</i> <sub>i</sub><br>0.3IC <sub>50</sub> | p <i>K</i> <sub>i</sub><br>control |
|------------------------------|---------------------------------------------|------------------------------------------------|------------------------------------|
| <b>4</b> <sup>b</sup>        | 9.01 ± 0.05 <sup>ns</sup>                   | 8.84 ± 0.04 <sup>ns</sup>                      | 9.03 ± 0.10                        |
| <b>ZM241385</b> <sup>c</sup> | 8.94 ± 0.07 <sup>ns</sup>                   | 8.84 ± 0.03 <sup>ns</sup>                      | 8.77 ± 0.04                        |

<sup>a</sup>Data are expressed as means ± SEM of three separate experiments each performed in duplicate. ns indicates a non-significant difference with p>0.05 when compared with the p*K*<sub>i</sub> values in control groups; One-way ANOVA test.

<sup>b</sup>Affinity of ZM241385, expressed as p*K*<sub>i</sub> value, determined from displacement of specific [<sup>3</sup>H]ZM241385 binding from the hA<sub>2A</sub>R cell membranes preincubated with compound **4** at indicated concentrations for 3 h at 25 °C and then treated with a three-cycle washing step.

<sup>c</sup>Affinity of ZM241385, expressed as p*K*<sub>i</sub> value, determined from displacement of specific [<sup>3</sup>H]ZM241385 binding from the hA<sub>2A</sub>R cell membranes preincubated with ZM241385 at indicated concentrations for 3 h at 25 °C and then treated with a three-cycle washing step.
